# Supplementary material
Source: publisher site journal article supplement (https://www.spandidos-publications.com/604/downloadSupplementary)

Figure S1. Expression of MCM10 is significantly elevated in lung cancer samples from TCGA database. TCGA, the Cancer Genome Atlas; MCM10, minichromosome maintenance complex component 10; LUAD, lung adenocarcinoma; LUSC, lung squamous carcinoma.

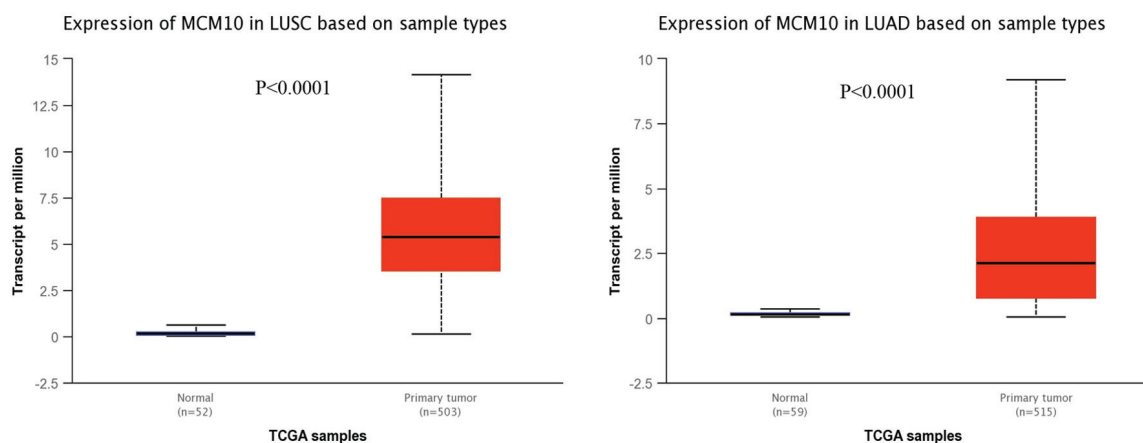

Figure S2. Diagnostic value of MCM10. Receiver operating characteristic curve indicates that MCM10 expression can discriminate between lung cancer and healthy patients. MCM10, minichromosome maintenance complex component 10; AUC, area under the curve; CI, confidence interval.

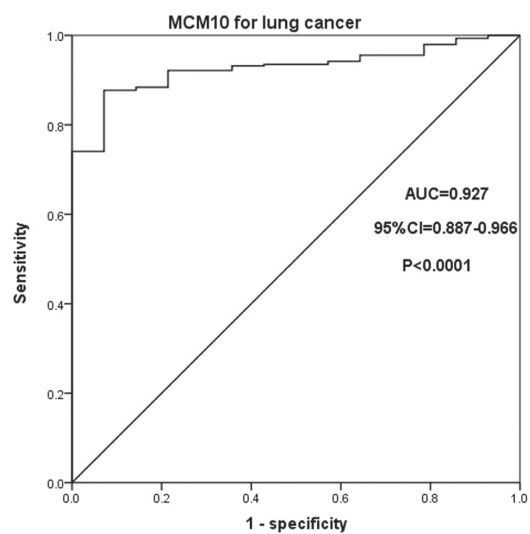

Figure S3. Effect of MCM10 downregulation on cell apoptosis. Flow cytometry analysis of apoptosis in A549 cells after 48 h of transfection. The apoptosis rate was calculated as the sum of early and late apoptosis. Data are presented as the mean  $\pm$  SEM from three independent experiments. MCM10, minichromosome maintenance complex component 10; NC, negative control; siMCM10, small interfering RNA targeting MCM10.

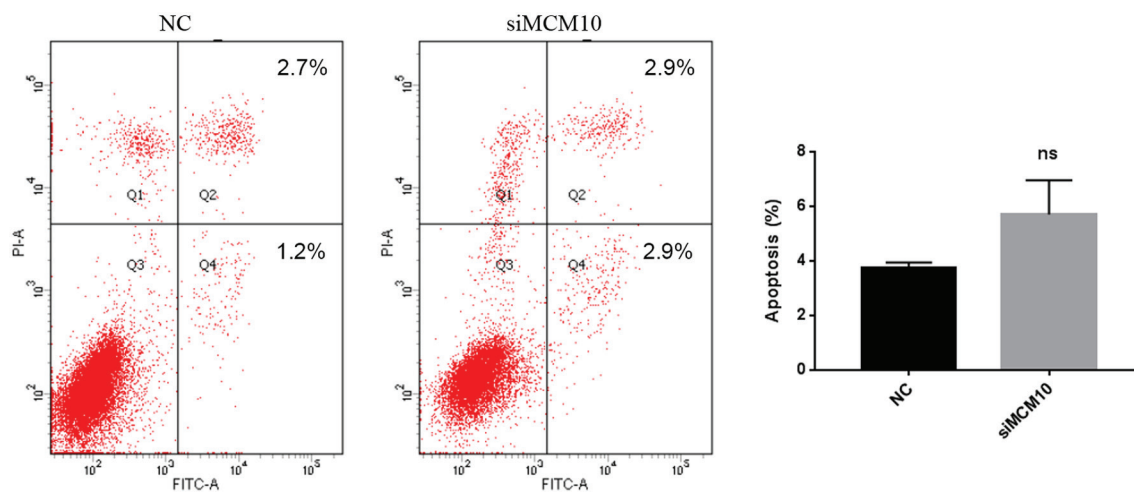

Figure S4. Potential value of CCND1 expression in predicting survival of patient with different subtypes of lung cancer. Stratified analysis of the association between CCND1 expression and overall survival of (A) all lung cancer patients, (B) patients aged  $\leq 60$  years, (C) patients with stage I-II lung cancer, (D) patients with negative lymph node infiltration, and (E) patients with no distant metastasis. CCND1, cyclin D1.

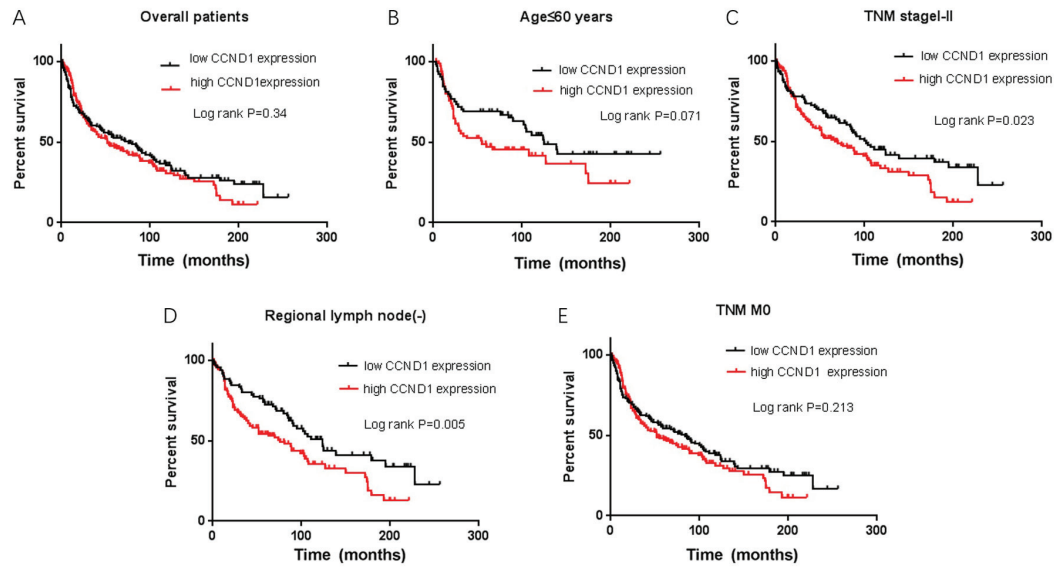

Supplement: Supplementary file 1 [file downloadSupplementary]
